# Supplementary material for: Investigation of magnetite–Co interactions: from environmentally relevant trace Co levels to core–shell Fe3O4@Co(OH)2 nanoparticles with magnetic applications
Source: Royal Society of Chemistry journal article supplement (doi:10.1039/d3en00379e), 2023-01-01
Supplement: d3en00379e1.pdf [file d3en00379e1.pdf]

## Supporting information

### **Investigation of magnetite-Co interactions: from environmentally relevant trace Co levels to core-shell $\text{Fe}_3\text{O}_4@\text{Co}(\text{OH})_2$ nanoparticles with magnetic applications**

Laura Fablet<sup>1,2</sup>, Fadi Choueikani<sup>2</sup>, Mathieu Pédrot<sup>1</sup>, Margaux Kerdiles<sup>1</sup>, Mathieu Pasturel<sup>3</sup>  
and Rémi Marsac<sup>1\*</sup>

<sup>1</sup> Univ Rennes, CNRS, Géosciences Rennes – UMR 6118, F-35000 Rennes, France

<sup>2</sup> Synchrotron SOLEIL, l'Orme des Merisiers, Départementale 128, 91190 Saint-Aubin, France

<sup>3</sup>Univ Rennes, CNRS, ISCR – UMR 6226, F-35000, Rennes, France

(\*corresponding author: remi.marsac@cnrs.fr)

**Table S1** Corresponding total ( $[Co]_{tot}$ ), aqueous ( $[Co]_{aq}$ ) and solid ( $[Co]_s$ ) concentrations of cobalt. \*Samples analyzed by XAS and XMCD.

| $[Co]_{tot}$ (mM) | $[Co]_{aq}$ (mM) | $[Co]_s$ (mM) | $[Co]_s$ (atom nm <sup>-2</sup> ) |
|-------------------|------------------|---------------|-----------------------------------|
| 0.003             | 0.000002         | 0.003         | 0.04                              |
| 0.005             | 0.000003         | 0.005         | 0.06                              |
| 0.01*             | 0.000006         | 0.010         | 0.12                              |
| 0.02              | 0.000054         | 0.020         | 0.24                              |
| 0.04 *            | 0.000286         | 0.040         | 0.48                              |
| 0.1 *             | 0.001213         | 0.099         | 1.19                              |
| 0.16              | 0.001895         | 0.158         | 1.90                              |
| 0.2 *             | 0.015321         | 0.185         | 2.22                              |
| 0.32              | 0.017277         | 0.303         | 3.65                              |
| 0.64              | 0.051845         | 0.588         | 7.08                              |
| 0.8 *             | 0.110548         | 0.689         | 8.30                              |
| 1.28              | 0.366694         | 0.913         | 11.00                             |
| 2.56              | 0.740426         | 1.820         | 21.92                             |
| 3.00 *            | 0.863300         | 2.137         | 25.74                             |

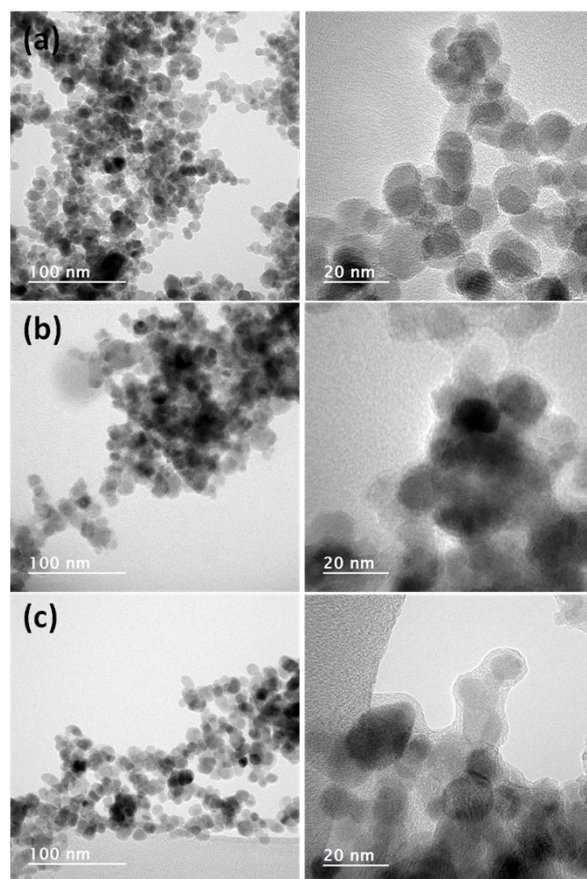

**Fig. S1** TEM images of stoichiometric magnetite nanoparticles with various Co concentrations: (a)  $[Co]_s = 0.12 \text{ atom nm}^{-2}$ , (b)  $[Co]_s = 8.30 \text{ atom nm}^{-2}$ , and (c)  $[Co]_s = 25.74 \text{ atom nm}^{-2}$ . The first image has a scale of 100 nm; the second of 20 nm.

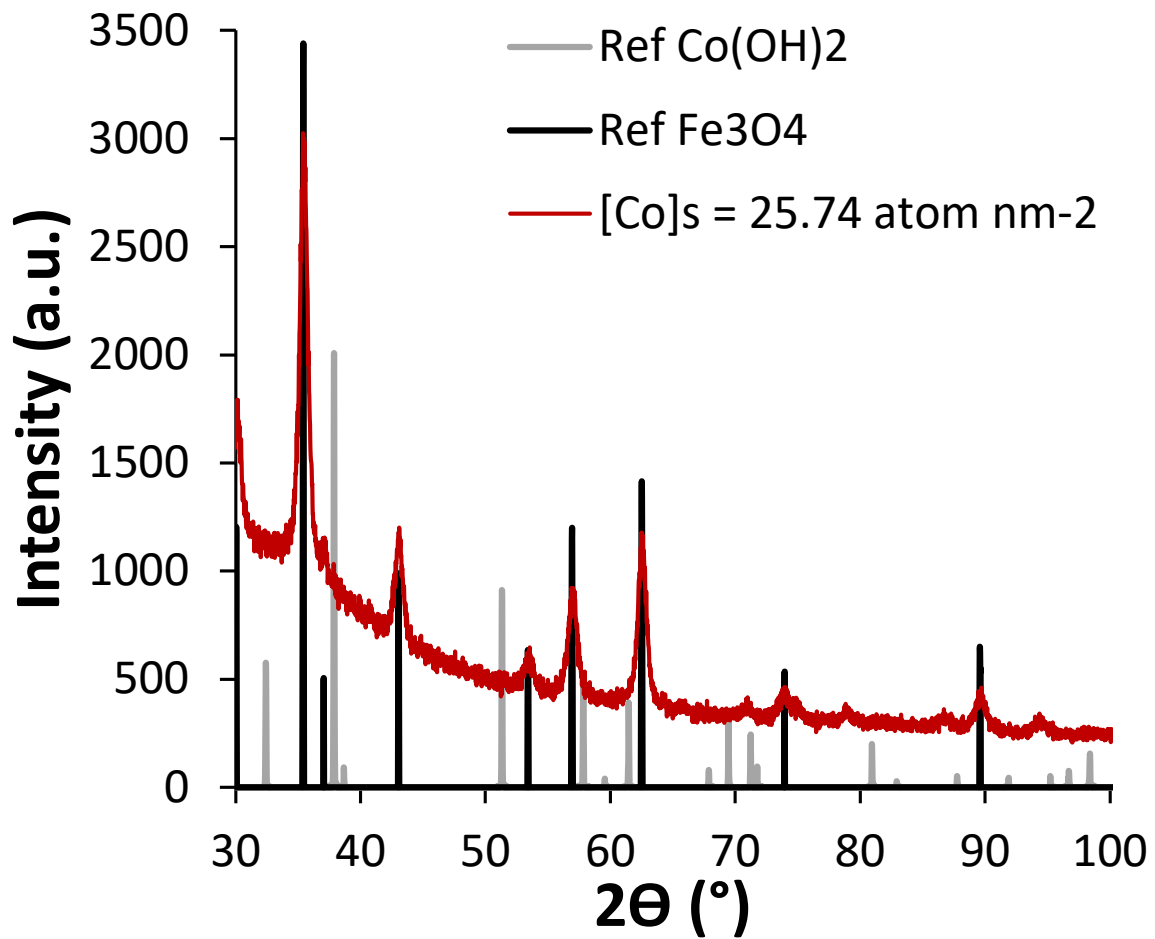

**ig. S2** X-ray diffraction (XRD) pattern of the magnetite sample with  $[Co]_s = 25.74$  atom nm<sup>-2</sup> (red line), and theoretical patterns of Co(OH)<sub>2(s)</sub> (grey line) and Fe<sub>3</sub>O<sub>4</sub> (black line). *F*

**Table S2** Optimized parameters of equation 1, for Langmuir models ( $L_1$  and  $L_2$ ) and Freundlich model ( $F$ ).  $Q_{max}$  is the adsorption capacities (atom  $nm^{-2}$ ).

|              | <b>L<sub>1</sub></b> | <b>L<sub>2</sub></b> | <b>F</b>    |
|--------------|----------------------|----------------------|-------------|
| <b>Q</b>     | 0.45 ± 0.13          | 10.09 ± 1.70         |             |
| <b>Log K</b> | 4.68 ± 0.17          | 1.41 ± 0.36          | 1.37 ± 0.26 |
| <b>n</b>     |                      |                      | 2.34 ± 0.58 |

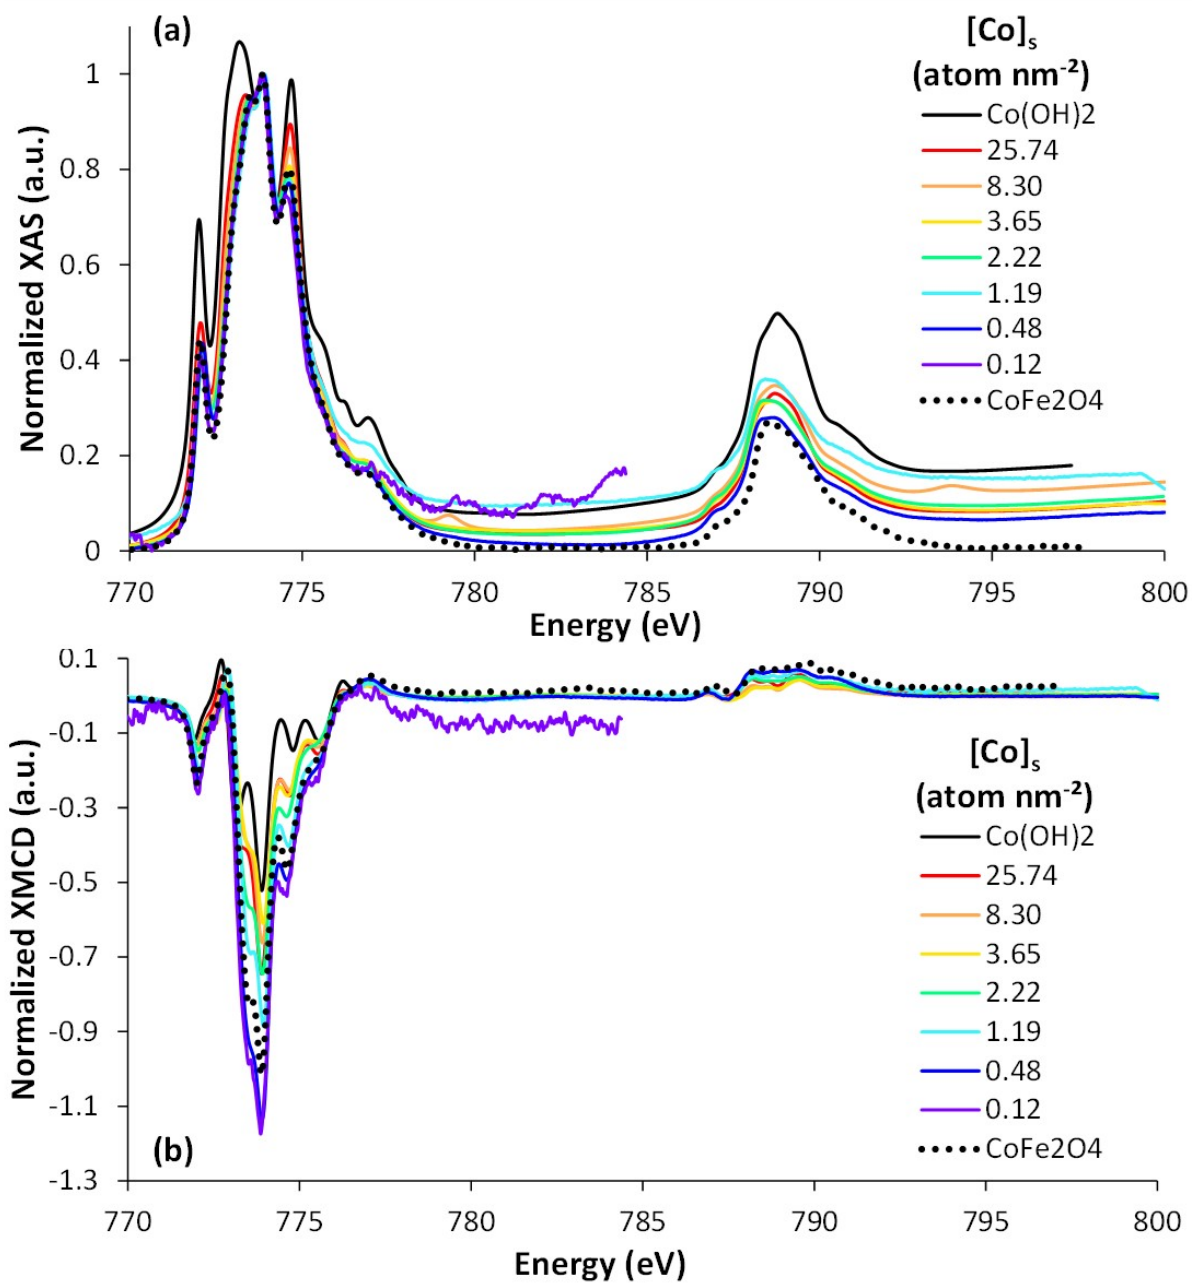

**Fig. S3** Normalized XAS (a) and XMCD (b) spectra at the  $L_{2,3}$  cobalt edge of stoichiometric magnetite with different  $[Co]_s$  (from 0.12 to 25.74 atom  $\text{nm}^{-2}$ ). XMCD and XAS signals are normalized by dividing the raw signal by the edge jump of XAS.

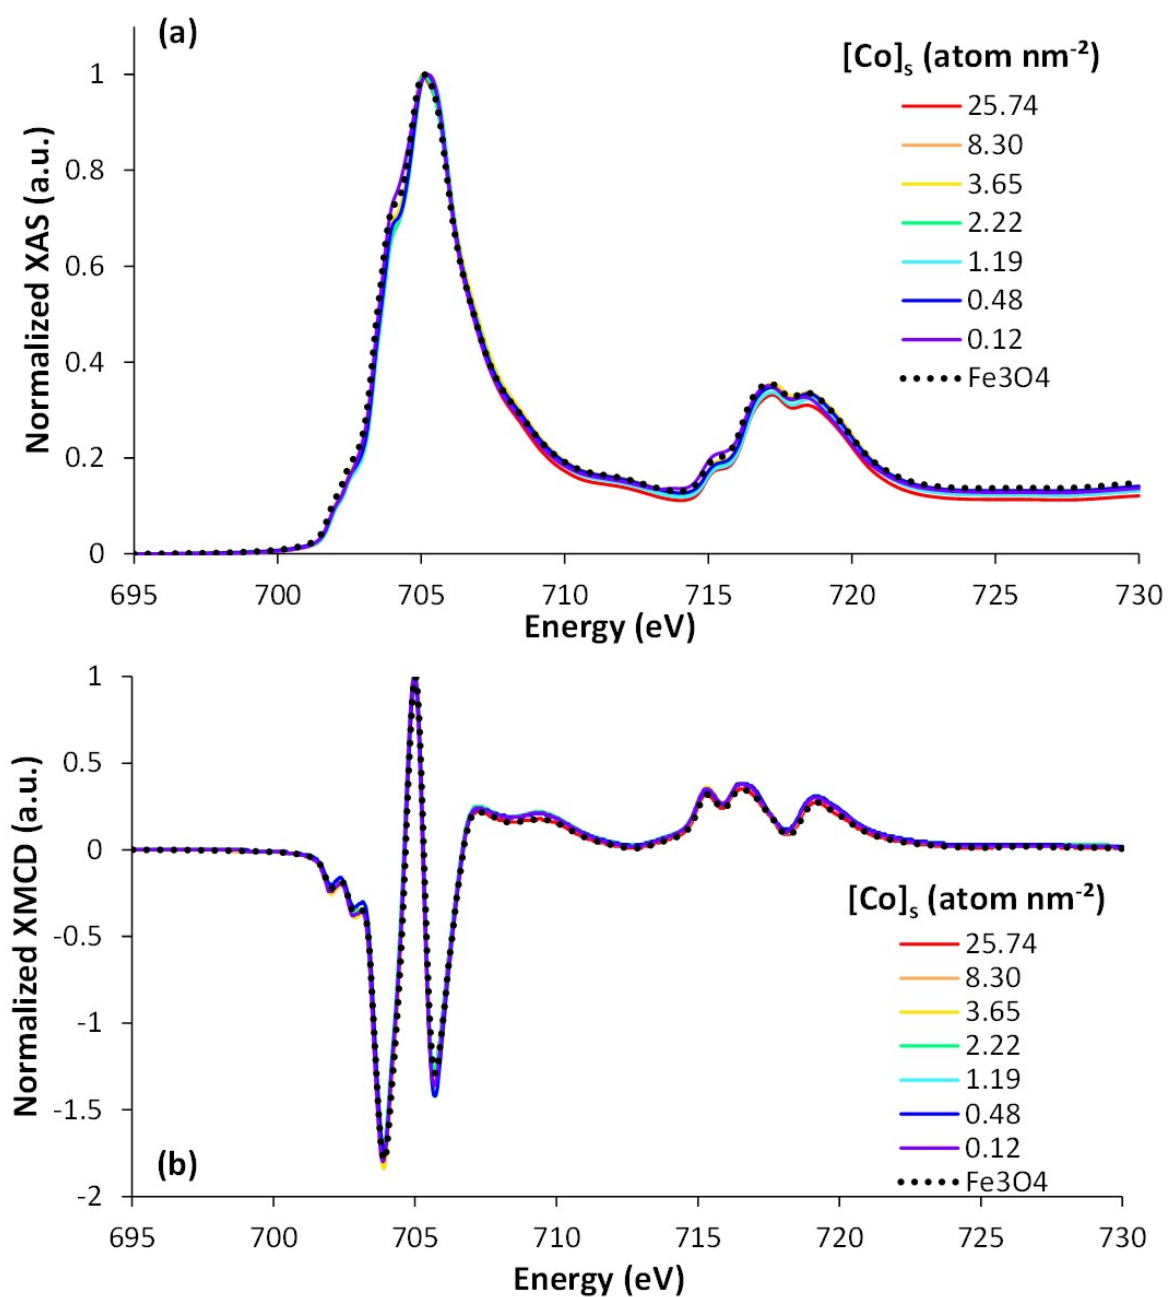

**Fig. S4** Normalized XAS (a) and XMCD (b) spectra at the Fe  $L_{2-3}$ -edge of stoichiometric magnetite with different  $[Co]_s$  (from 0.12 to 25.74 atom  $nm^{-2}$ ). XAS signals are normalized by dividing the raw signal by the edge jump of XAS. XMCD signal was normalized to the  $Fe^{3+}_{(Td)}$  peak (positive one).

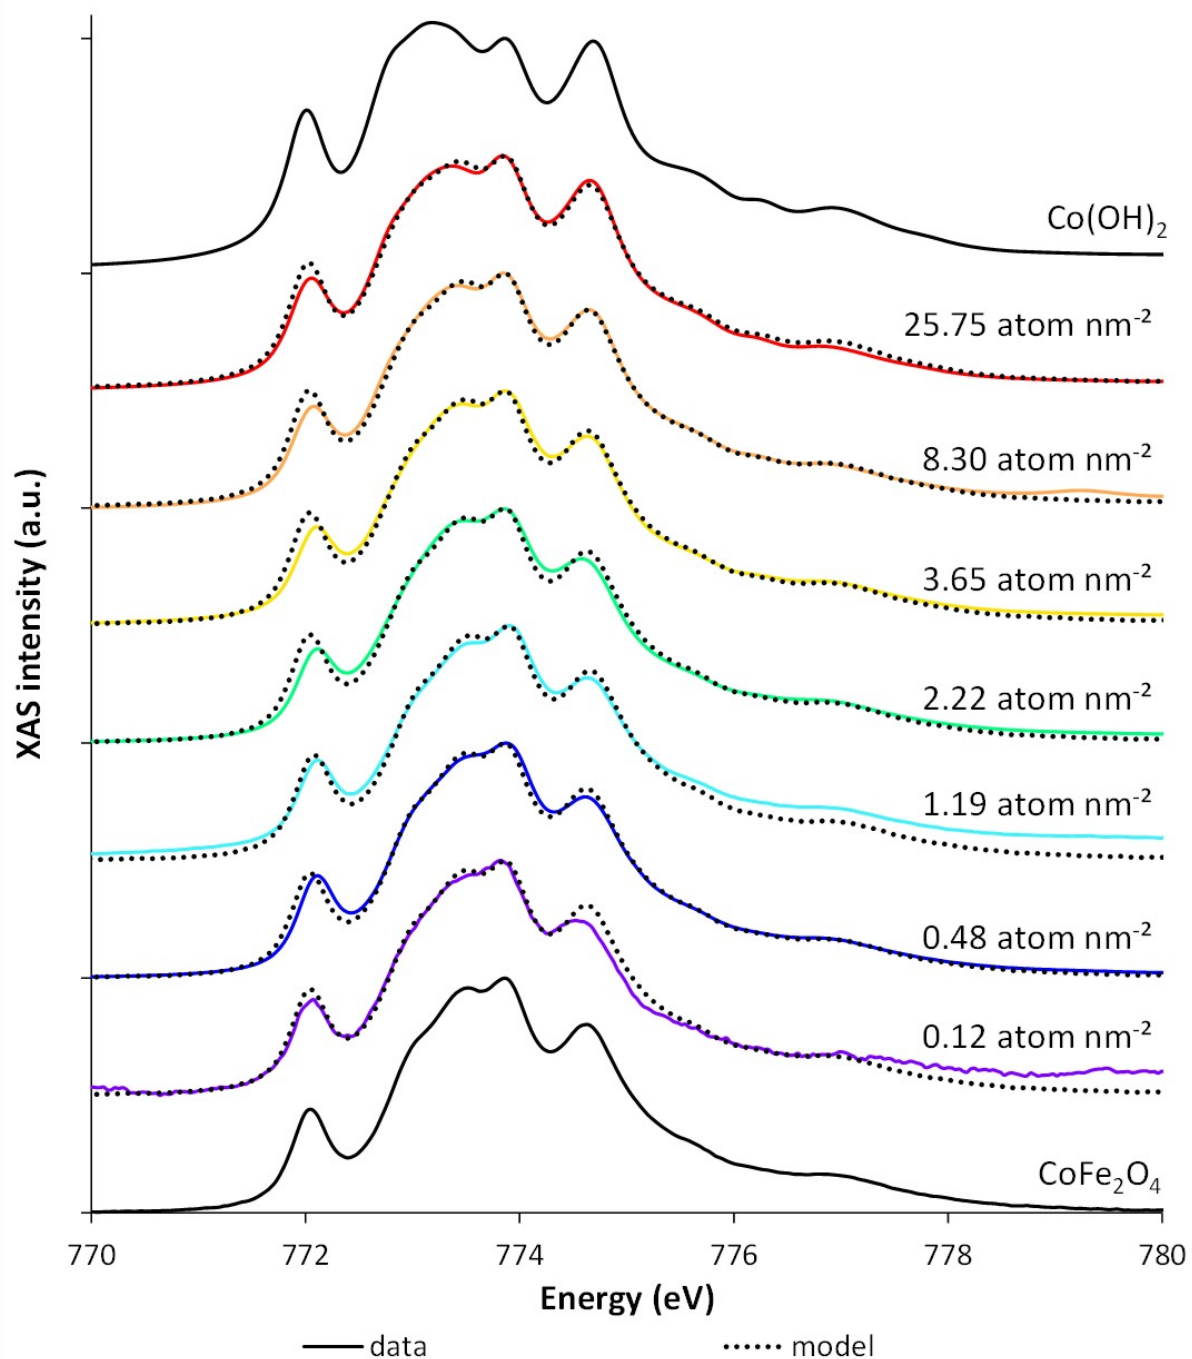

**Fig. S5** Linear combination analysis of normalized XAS spectra at Co L<sub>3</sub> edge for different [Co]<sub>s</sub> (from 0.12 to 25.74 atom nm<sup>-2</sup>). Data are represented by a solid line and models by a dotted line.



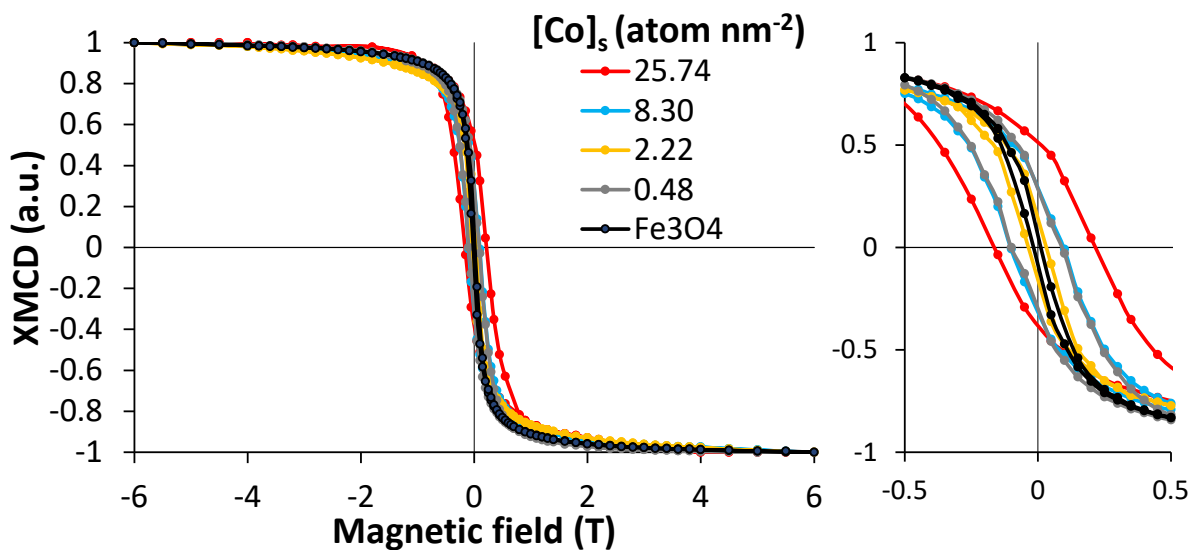

**Fig. S6** XMCD magnetization versus magnetic field measurement at Fe edge at 4.2 K for four  $[Co]_s$  (from 0.48 to 25.74 atom  $nm^{-2}$ ) and a sample of stoichiometric  $Fe_3O_4$  without Co.

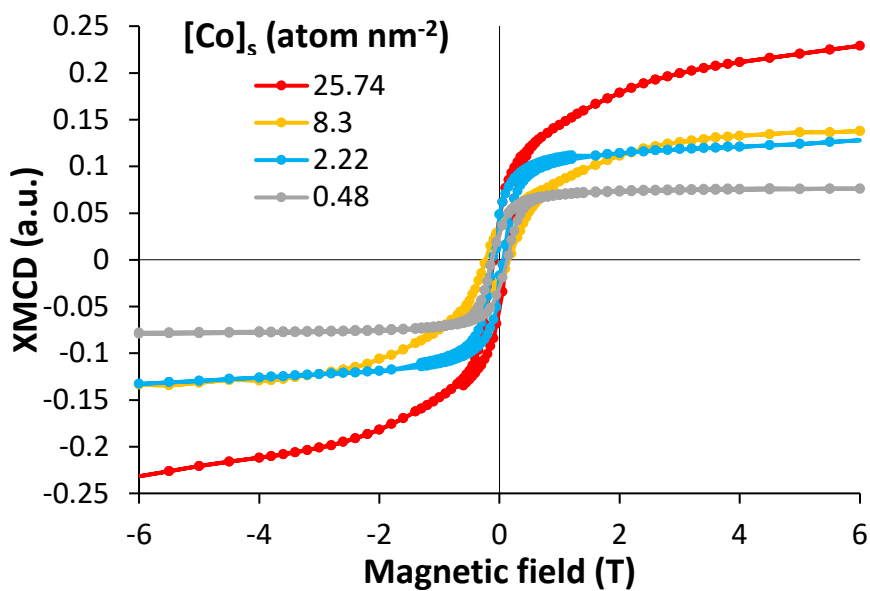

**Fig. S7** Raw XMCD magnetization curves versus magnetic field measurement at Co  $L_3$ -edge at 4.2 K for four solid cobalt concentrations (from 0.48 to 25.74 atom  $nm^{-2}$ ).
